# Supplementary material for: Fluorescence properties of heterotrinuclear Zn(ii)–M(ii) (M = Ca, Sr and Ba) bis(salamo)-type complexes
Source: Royal Society of Chemistry journal article supplement (doi:10.1039/c7ra08789f), 2017-01-01
Supplement: c7ra08789f1.pdf [file c7ra08789f1.pdf]

## Supporting Information

### **Fluorescence properties of hetero-trinuclear Zn(II)-M(II) (M=Ca, Sr and Ba) bis(Salamo)-type complexes**

Li Wang, Xiao-Yan Li, Qing Zhao, Li-Hong Li and Wen-Kui Dong\*

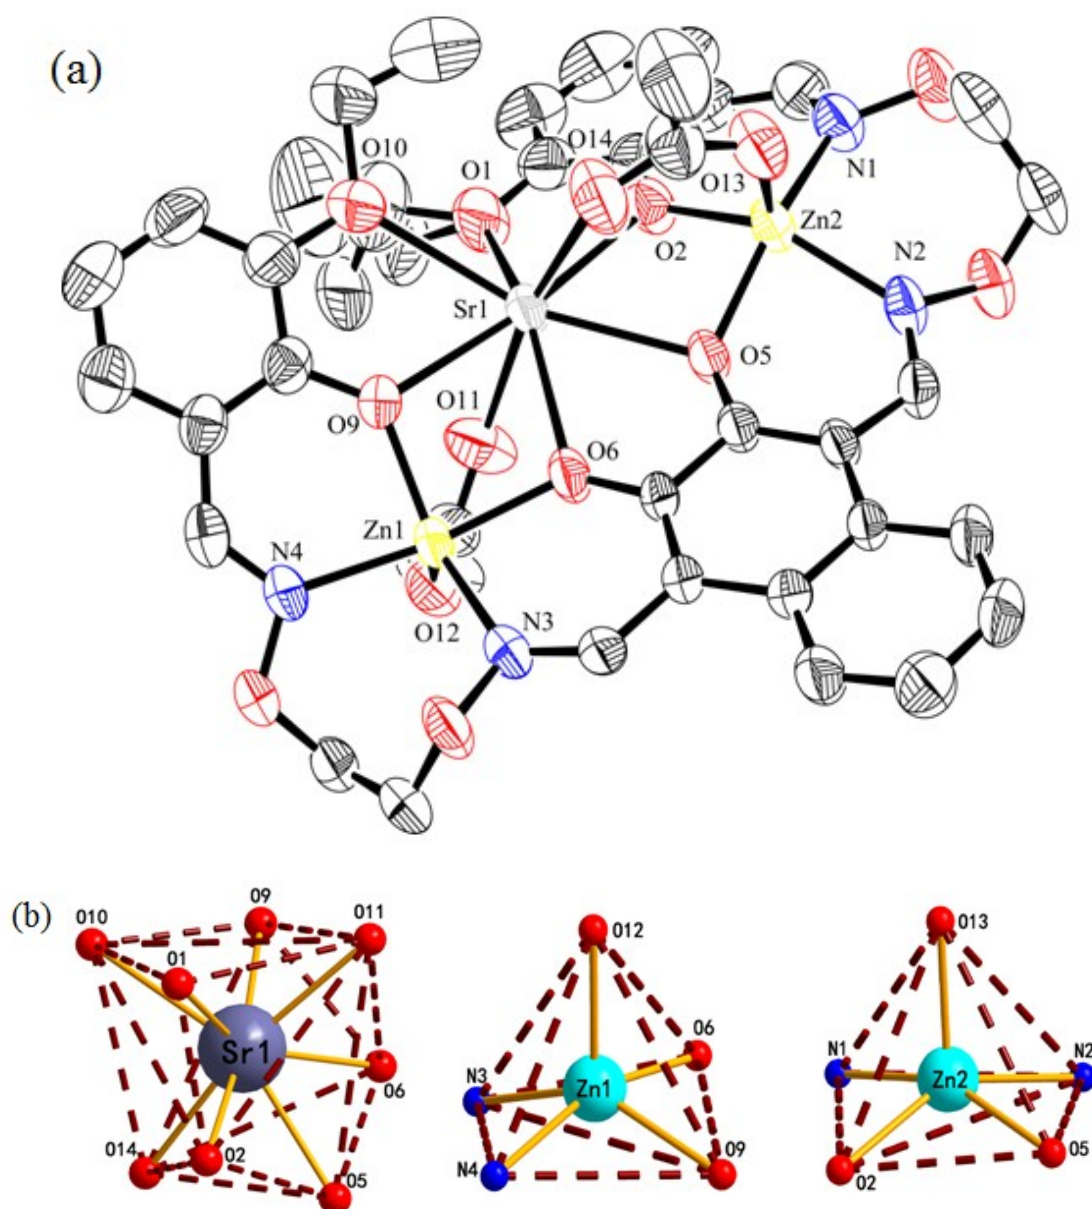

**Fig. S1** (a) View of the molecular structure of complex **2** (hydrogen atoms and solvent molecules are omitted for clarity, and thermal ellipsoids are drawn at the 30% probability level). (b) Coordination polyhedra for Zn(II) and Sr(II) atoms of complex **2**.

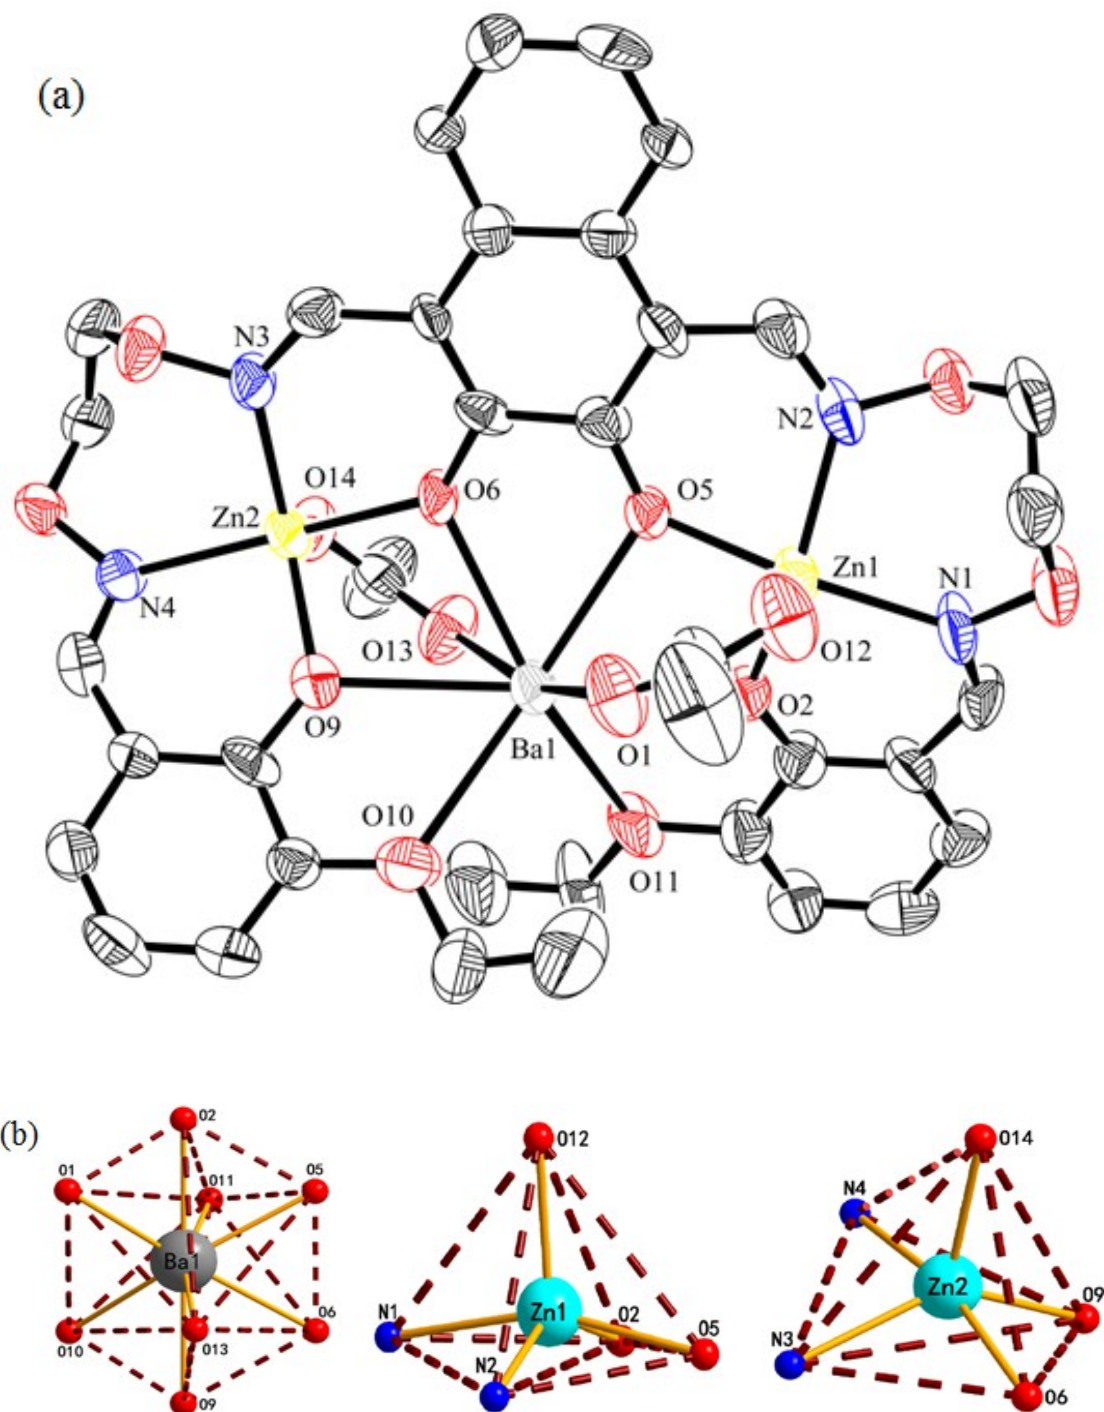

**Fig. S2** (a) View of the molecular structure of complex **3** (hydrogen atoms and solvent molecules are omitted for clarity, and thermal ellipsoids are drawn at the 30% probability level). (b) Coordination polyhedra for Zn(II) and Ba(II) atoms of complex **3**.

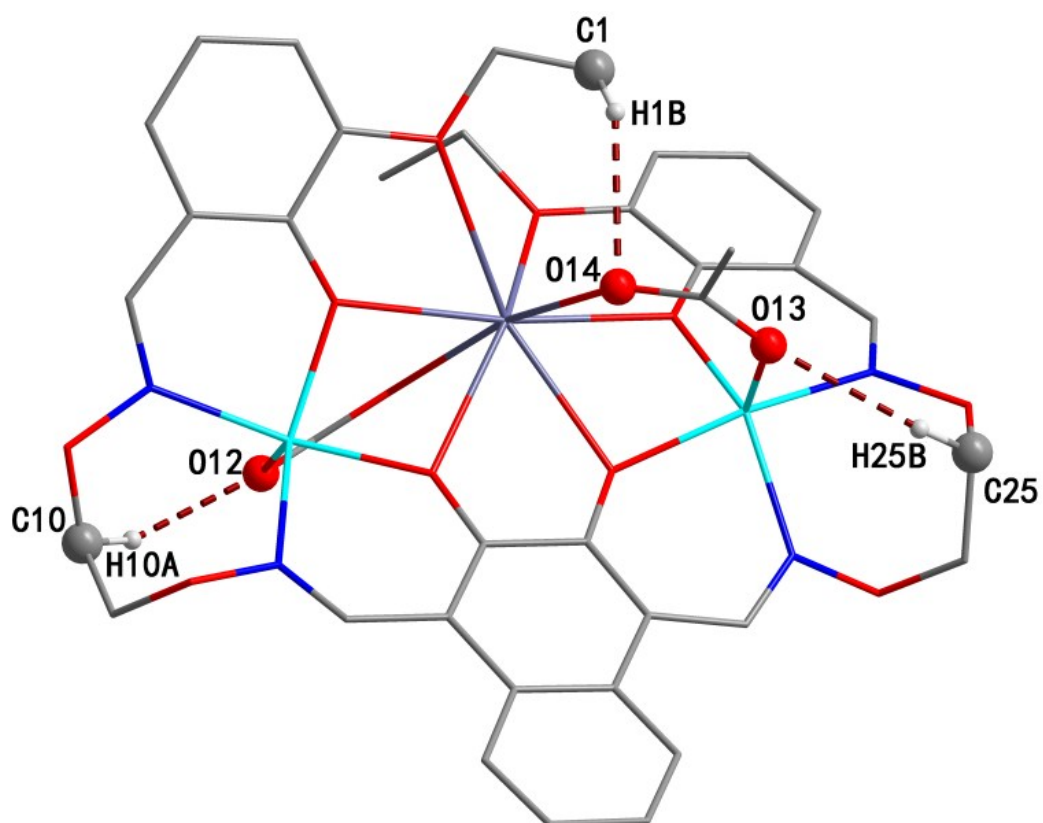

**Fig. S3** View of the intramolecular hydrogen bonds of complex 2.

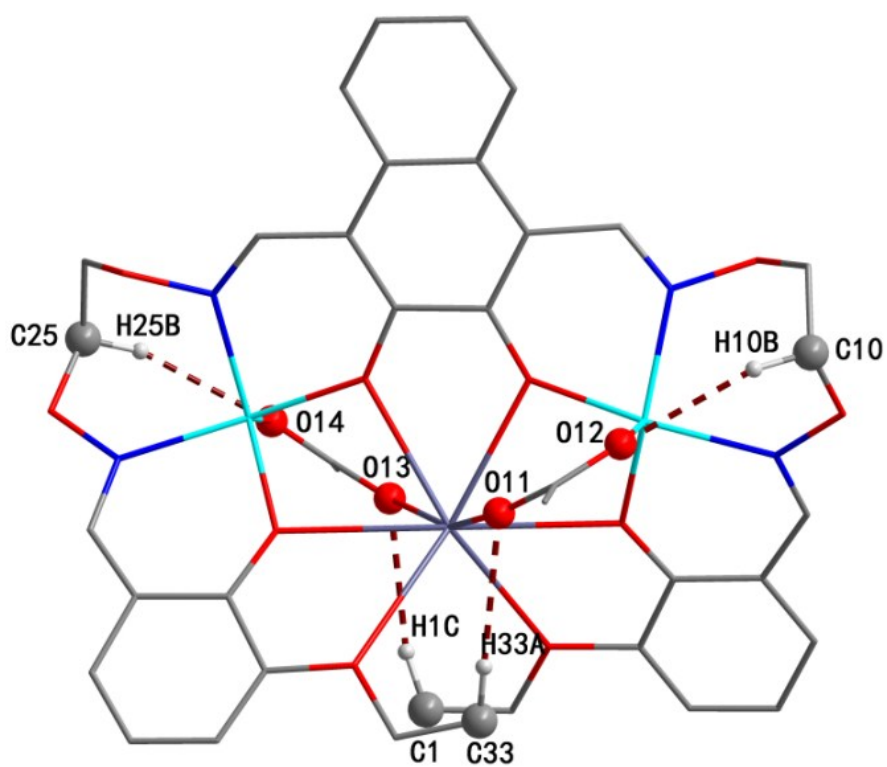

**Fig. S4** View of the intramolecular hydrogen bonds of complex 3.

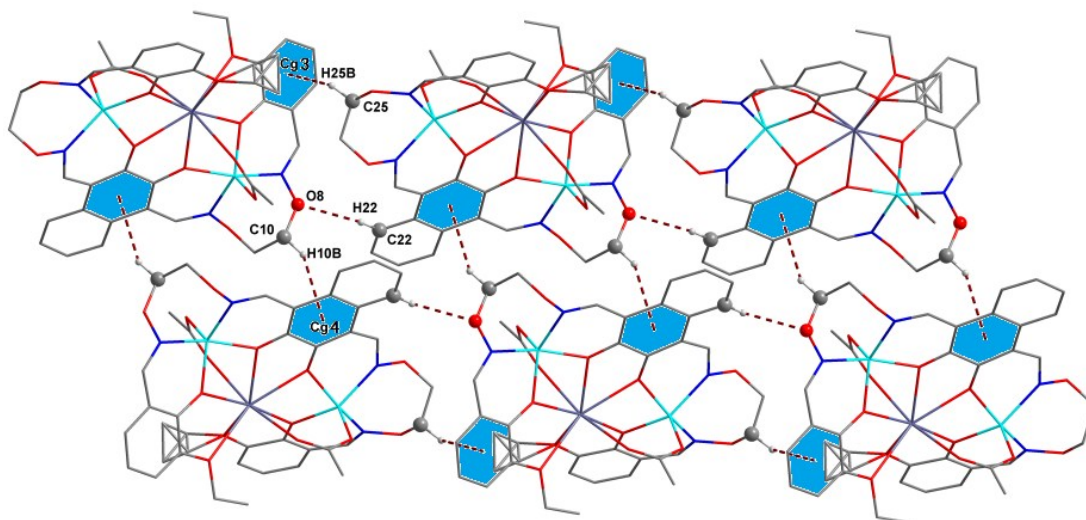

**Fig. S5** View of an infinite 2D supramolecular network of complex **2**.

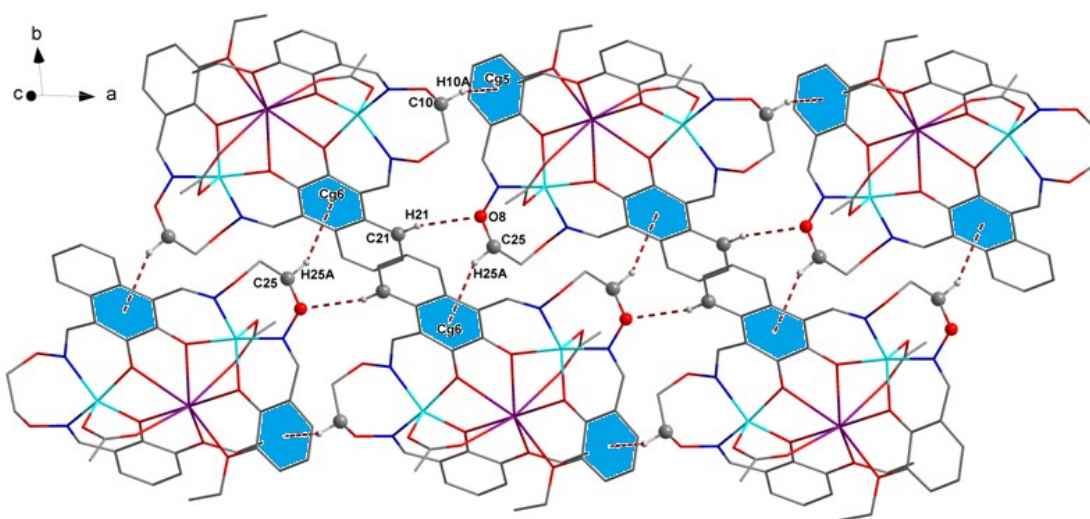

**Fig. S6** View of an infinite 2D supramolecular network of complex **3**.
